# Supplementary material for: Risk Alleles for Systemic Lupus Erythematosus in a Large Case-Control Collection and Associations with Clinical Subphenotypes
Source: PLOS journal article supplement (doi:10.1371/journal.pgen.1001311), 2011-02-17
Supplement: S3 (10.1371/journal.pgen.1001311.s003) [file journal.pgen.1001311.s003]

**Table S3. Association of GRS with SLE subphenotypes, by missing data method.**

|  | **Dropping data with missing covariates** | | | **Full data with multiple imputation†** | | | |
| --- | --- | --- | --- | --- | --- | --- | --- |
|  | N | OR* (95% CI) | p-value* | N | | OR* (95% CI) | p-value* |
| anti-dsDNA antibodies | 1533 | 1.10 (1.07-1.13) | 9.3E-12 | 1705 | | 1.09 (1.07-1.12) | 2.1E-10 |
| immunologic disorder | 1536 | 1.09 (1.06-1.13) | 4.4E-09 | 1887 | | 1.08 (1.05-1.11) | 1.1E-07 |
| oral ulcers | 1533 | 0.95 (0.92-0.97) | 5.0E-05 | 1888 | | 0.95 (0.93-0.97) | 4.3E-05 |
| renal disorder | 1541 | 1.06 (1.02-1.09) | 0.00036 | 1892 | | 1.05 (1.02-1.08) | 0.00067 |
| hematologic disorder | 1535 | 1.06 (1.03-1.09) | 4.3E-05 | 1886 | | 1.05 (1.02-1.07) | 0.00048 |
|  |  | βŦ (95% CI) |  |  | | βŦ (95% CI) |  |
| age at diagnosis | 1753 | -0.39 (-0.55--0.24) | 8.6E-07 | 1898 | | -0.36 (-0.52--0.21) | 0.00066 |
|  |  |  |  |  | |  |  |
| * OR per unit GRS, logistic regression adjusted for first 4 principal components (PCs), sex, study source, and disease duration. | | | | | | |  |
| Ŧ β per unit GRS, linear regression adjusted for first 4 PCs, sex, and study source. | | | | |  |  |  |
| † multiple imputation using Stata ICE [21] with predictive matching. | | | | |  |  |  |
